# Supplementary material for: A common type system for clinical natural language processing
Source: Springer Nature journal article supplement (doi:10.1186/2041-1480-4-1), 2013-01-01

Chief complaint: severe cough and fever. Cough started 2 days ago, no expectoration.

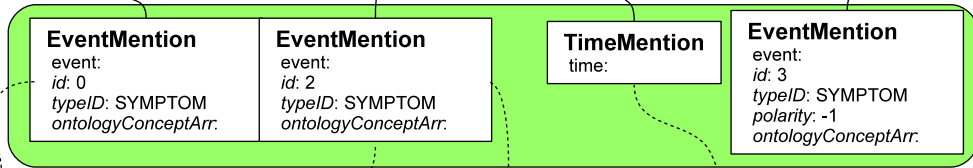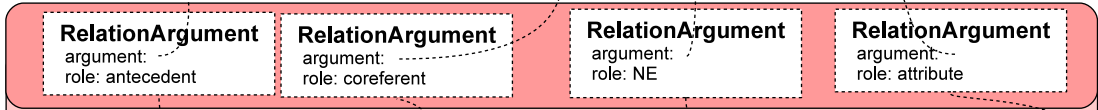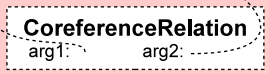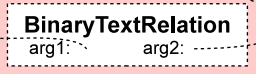

Supplement: 13326_2012_104_MOESM6_ESM.pdf [file 13326_2012_104_MOESM6_ESM.pdf]
