# Supplementary material for: A common type system for clinical natural language processing
Source: Springer Nature journal article supplement (doi:10.1186/2041-1480-4-1), 2013-01-01
Supplement: 13326_2012_104_MOESM7_ESM.pdf [file 13326_2012_104_MOESM7_ESM.pdf]

Chief complaint: severe cough and fever. Cough started 2 days ago, no expectoration.

### SourceData

sourceOriginalDate:

### EventMention

event:  
id: 0  
typeID: SYMPTOM  
ontologyConceptArr:

### EventMention

event:  
id: 2  
typeID: SYMPTOM  
ontologyConceptArr:

### TimeMention

time:

### EventMention

event:  
id: 3  
typeID: SYMPTOM  
polarity: -1  
ontologyConceptArr:

### Date

day: 3  
month: 9  
year: 2006

### Severity

value: NE\_ATTR\_SEVERE

### SignSymptom

severity:  
startTime:  
ontologyConcept:  
mentions:

### Time

normalizedForm: 09/01/2006

### SignSymptom

ontologyConcept:  
mentions:  
polarity: -1

### ManifestationOf

arg1:  
arg2:  
polarity: -1
